# Supplementary material for: Carbon-coated Ni0.5Mg0.5Fe1.7Mn0.3O4 nanoparticles as a novel anode material for high energy density lithium-ion batteries
Source: Royal Society of Chemistry journal article supplement (doi:10.1039/d4cp00182f), 2024-01-01
Supplement: d4cp00182f1.pdf [file d4cp00182f1.pdf]

## **Carbon-coated $\text{Ni}_{0.5}\text{Mg}_{0.5}\text{Fe}_{1.7}\text{Mn}_{0.3}\text{O}_4$ as novel anode material for high energy density lithium-ion batteries**

Khadija Kouchi<sup>a</sup>, Marwa Tayoury<sup>a</sup>, Abdelwahed Chari<sup>a</sup>, Loubna Hdidou<sup>a</sup>, Zakaria Chchiyai<sup>b</sup>,  
Khadija El kamouny<sup>c</sup>, Youssef Tamraoui<sup>a</sup>, Jones Alami<sup>a</sup>, Bouchaib Manoun<sup>a,b</sup>, and Mouad  
Dahbi<sup>a\*</sup>

<sup>a</sup>*Materials Science, Energy, and Nano-engineering Department, Mohammed VI Polytechnic University, Lot 660-Hay Moulay Rachid, 43150, Ben Guerir, Morocco.*

<sup>b</sup>*Hassan First University, FST Settati, Rayonnement-Matière et Instrumentation, S3M, 26000, Settati, Morocco.*

<sup>c</sup>*Green Tech Institute Department, Mohammed VI Polytechnic University UM6P, Ben Guerir, Morocco*

*\*Corresponding author email: [Mouad.dahbi@um6p.ma](mailto:Mouad.dahbi@um6p.ma)*

**\* Corresponding author:** Materials Science, Energy and Nano-engineering MSN Department, Mohammed VI Polytechnic University, Lot 660, Hay Moulay Rachid, Ben Guerir 43150, Morocco

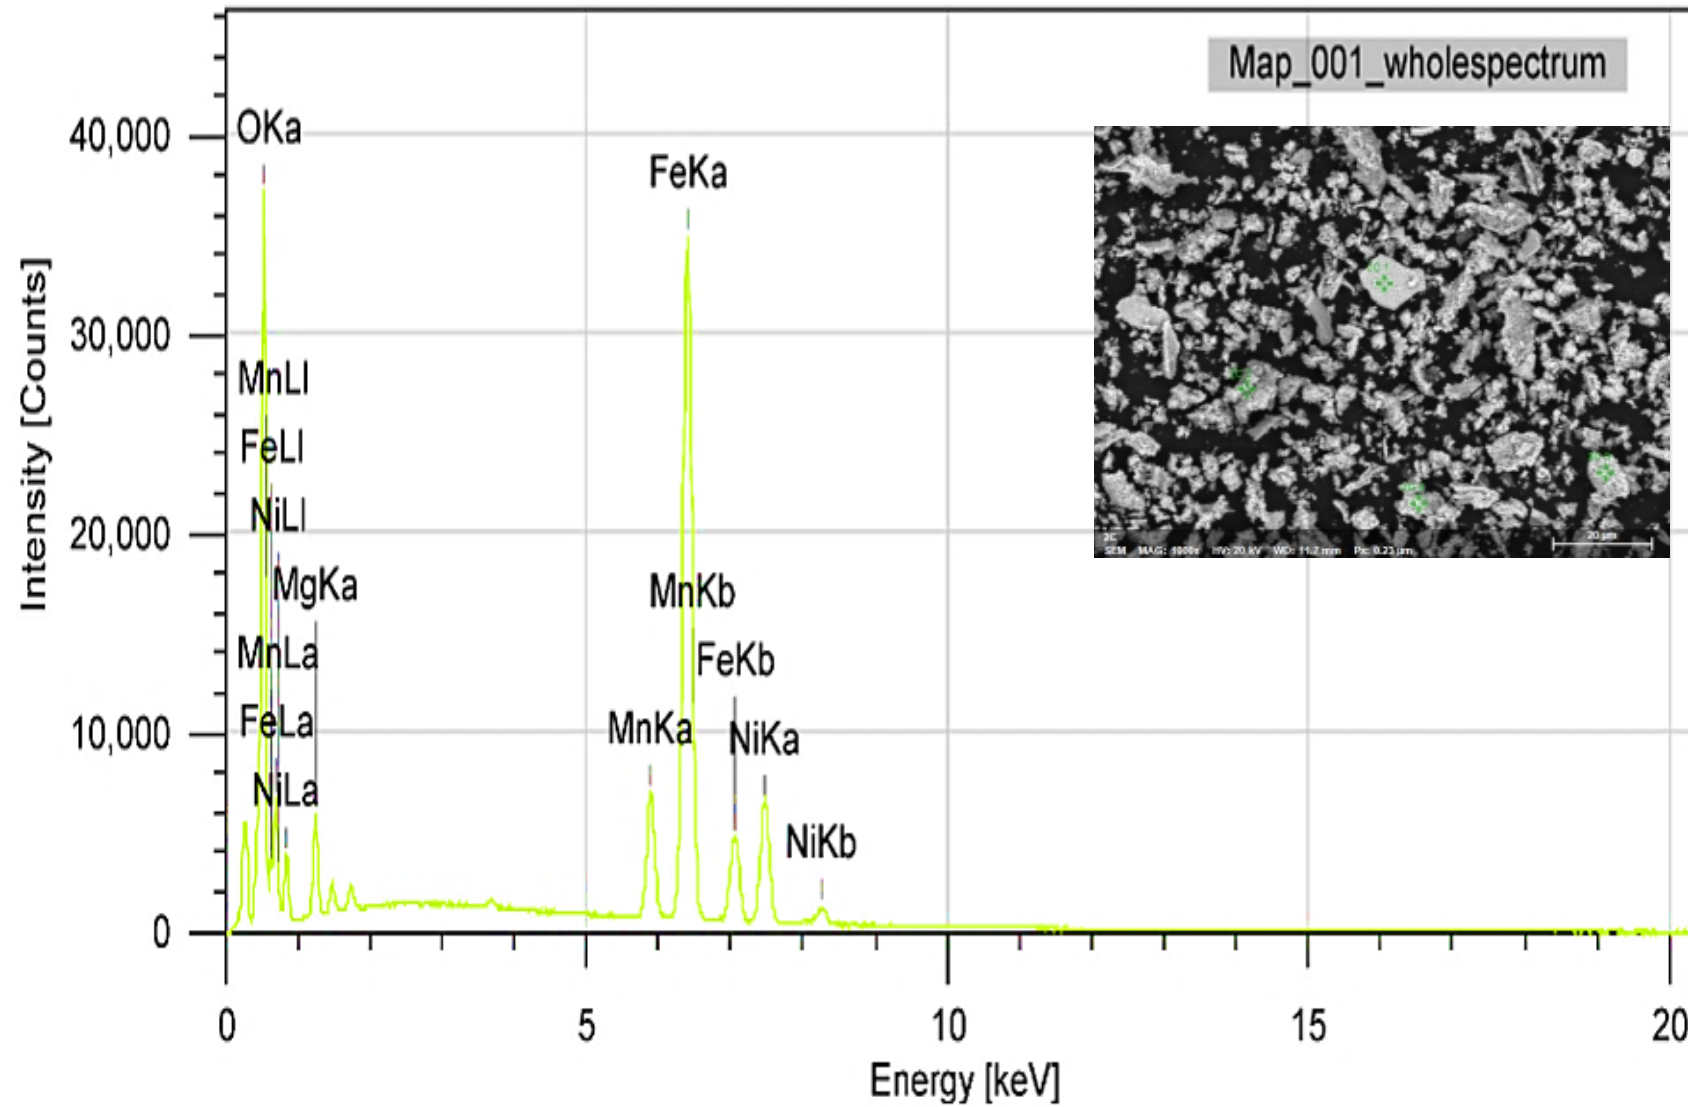

**Fig. S1.** EDX spectra of  $\text{Ni}_{0.5}\text{Mg}_{0.5}\text{Fe}_{1.7}\text{Mn}_{0.3}\text{O}_4$  material

**Table S1.** The results of the Rietveld analysis for structural parameters, Chi-squared factor ( $\chi^2$ ), and various reliability R-factors for the synthesized  $\text{Ni}_{0.5}\text{Mg}_{0.5}\text{Fe}_{1.7}\text{Mn}_{0.3}\text{O}_4$  material.

| Material           | $\text{Ni}_{0.5}\text{Mg}_{0.5}\text{Fe}_{1.7}\text{Mn}_{0.3}\text{O}_4$            |
|--------------------|-------------------------------------------------------------------------------------|
| Wavelengths (Å)    | $\lambda_{\text{k}\alpha 1} = 1.54056$<br>$\lambda_{\text{k}\alpha 2} = 1.54439$    |
| Crystal structure  | Cubic structure                                                                     |
| Space group        | 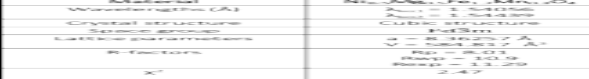 |
| Lattice parameters | $a = 8.36257 \text{ \AA}$<br>$V = 584.817 \text{ \AA}^3$                            |
| R-factors          | $R_p = 8.01$<br>$R_{wp} = 10.9$<br>$R_{exp} = 11.29$                                |
| $\chi^2$           | 2.47                                                                                |

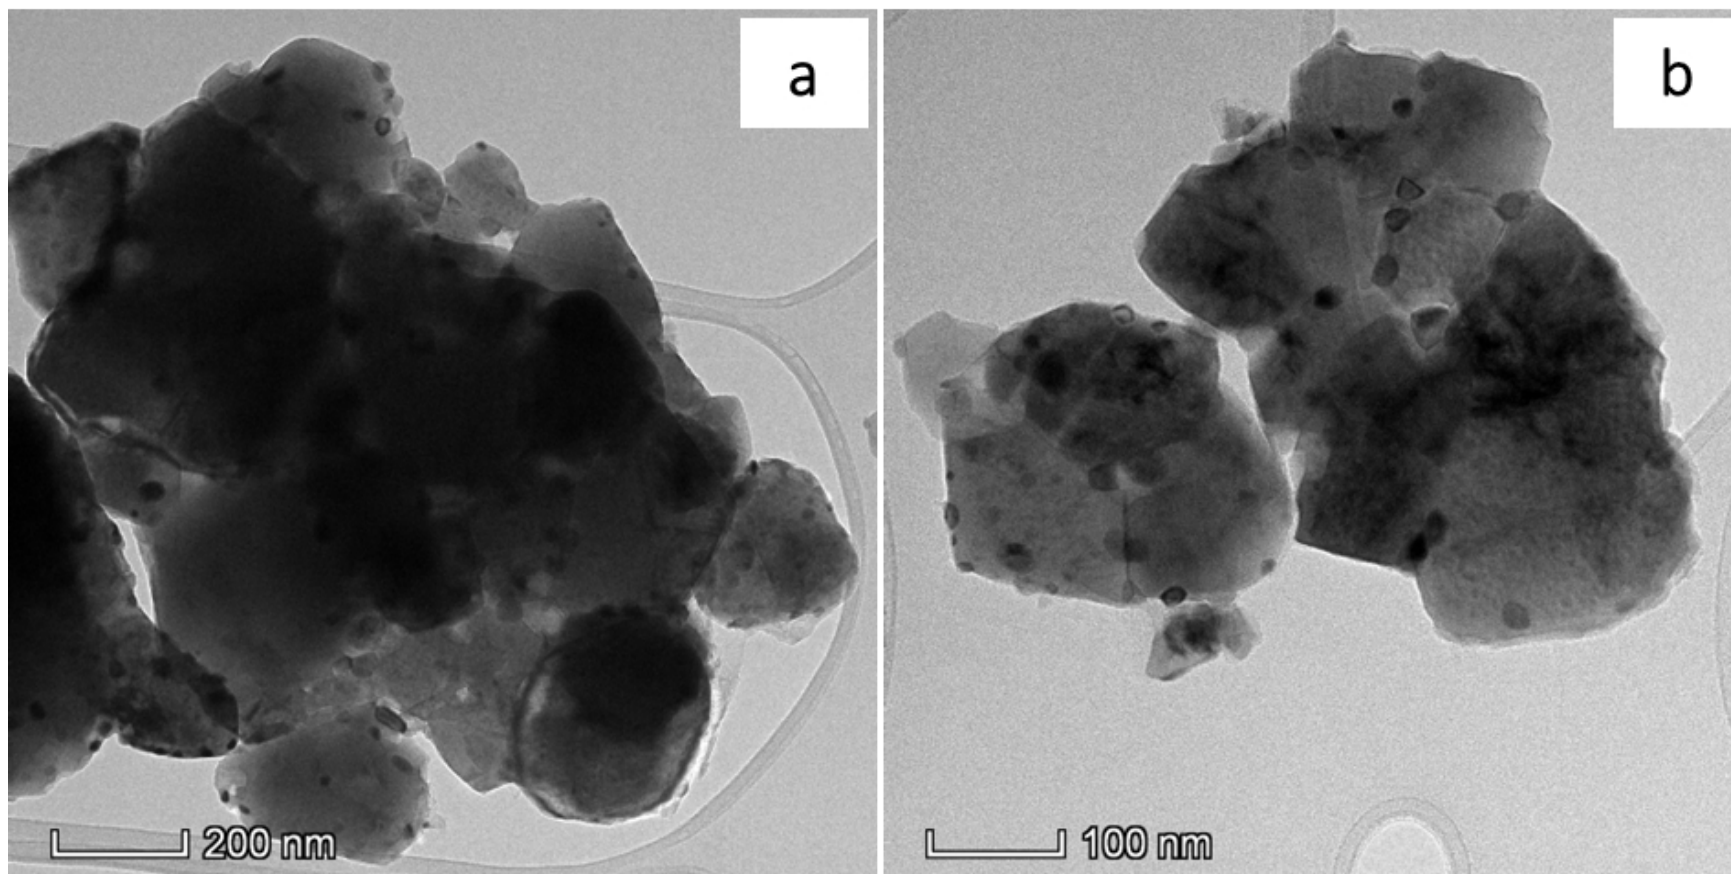

**Fig. S2.** TEM images of the uncoated  $\text{Ni}_{0.5}\text{Mg}_{0.5}\text{Fe}_{1.7}\text{Mn}_{0.3}\text{O}_4$  sample.

**Table S2.** Comparison of the capacities for the 75<sup>th</sup> cycles at 0.125C, 100<sup>th</sup> cycles at 2C (100 mA. g<sup>-1</sup> = 0.125C), and rate capability performance of uncoated and carbon-coated Ni<sub>0.5</sub>Mg<sub>0.5</sub>Fe<sub>1.7</sub>Mn<sub>0.3</sub>O<sub>4</sub> (the unit of capacity: mAh. g<sup>-1</sup>).

| Anode material                                                                            | Capacity of the 75 <sup>th</sup> cycle at 0.125 C | Capacity of the 100 <sup>th</sup> cycle at 2C | Capacities at various C-rates |       |        |       |        |       |     |
|-------------------------------------------------------------------------------------------|---------------------------------------------------|-----------------------------------------------|-------------------------------|-------|--------|-------|--------|-------|-----|
|                                                                                           |                                                   |                                               | 0.03C                         | 0.06C | 0.125C | 0.25C | 0.625C | 1.25C | 2C  |
| Ni <sub>0.5</sub> Mg <sub>0.5</sub> Fe <sub>1.7</sub> Mn <sub>0.3</sub> O <sub>4</sub>    | 744.3                                             | 36                                            | 809                           | 739   | 710    | 681   | 637    | 593   | 192 |
| Ni <sub>0.5</sub> Mg <sub>0.5</sub> Fe <sub>1.7</sub> Mn <sub>0.3</sub> O <sub>4</sub> /C | 819.1                                             | 343                                           | 720                           | 778   | 760    | 731   | 690    | 651   | 372 |

**Table S3.** EIS fitting data of uncoated  $\text{Ni}_{0.5}\text{Mg}_{0.5}\text{Fe}_{1.7}\text{Mn}_{0.3}\text{O}_4$  and coated  $\text{Ni}_{0.5}\text{Mg}_{0.5}\text{Fe}_{1.7}\text{Mn}_{0.3}\text{O}_4/\text{C}$  electrodes before and after 100 cycles at 2C (100 mA.  $\text{g}^{-1} = 0.125\text{C}$ ).

| Anode material                                                                    |                  | $R_s$ ( $\Omega$ ) | $R_f$ ( $\Omega$ ) | $R_{ct}$ ( $\Omega$ ) | $R_{total}$ |
|-----------------------------------------------------------------------------------|------------------|--------------------|--------------------|-----------------------|-------------|
| $\text{Ni}_{0.5}\text{Mg}_{0.5}\text{Fe}_{1.7}\text{Mn}_{0.3}\text{O}_4$          | After rest       | 4.45               | 1012               | 18 646                | 19 662.5    |
|                                                                                   | After 100 cycles | 25.8               | 944.9              | 2145                  | 3115.7      |
| $\text{Ni}_{0.5}\text{Mg}_{0.5}\text{Fe}_{1.7}\text{Mn}_{0.3}\text{O}_4/\text{C}$ | After rest       | 3.98               | 162.4              | 10 237                | 10 403.4    |
|                                                                                   | After 100 cycles | 3.59               | 51.68              | 400                   | 455.3       |
